# Supplementary material for: Calypogeia (Calypogeiaceae, Marchantiophyta) in Pacific Asia: Updates from Molecular Revision with Particular Attention to the Genus in North Indochina
Source: MDPI journal article supplement (doi:10.3390/plants11070983), 2022-04-04
Supplement: s1 [file s1]

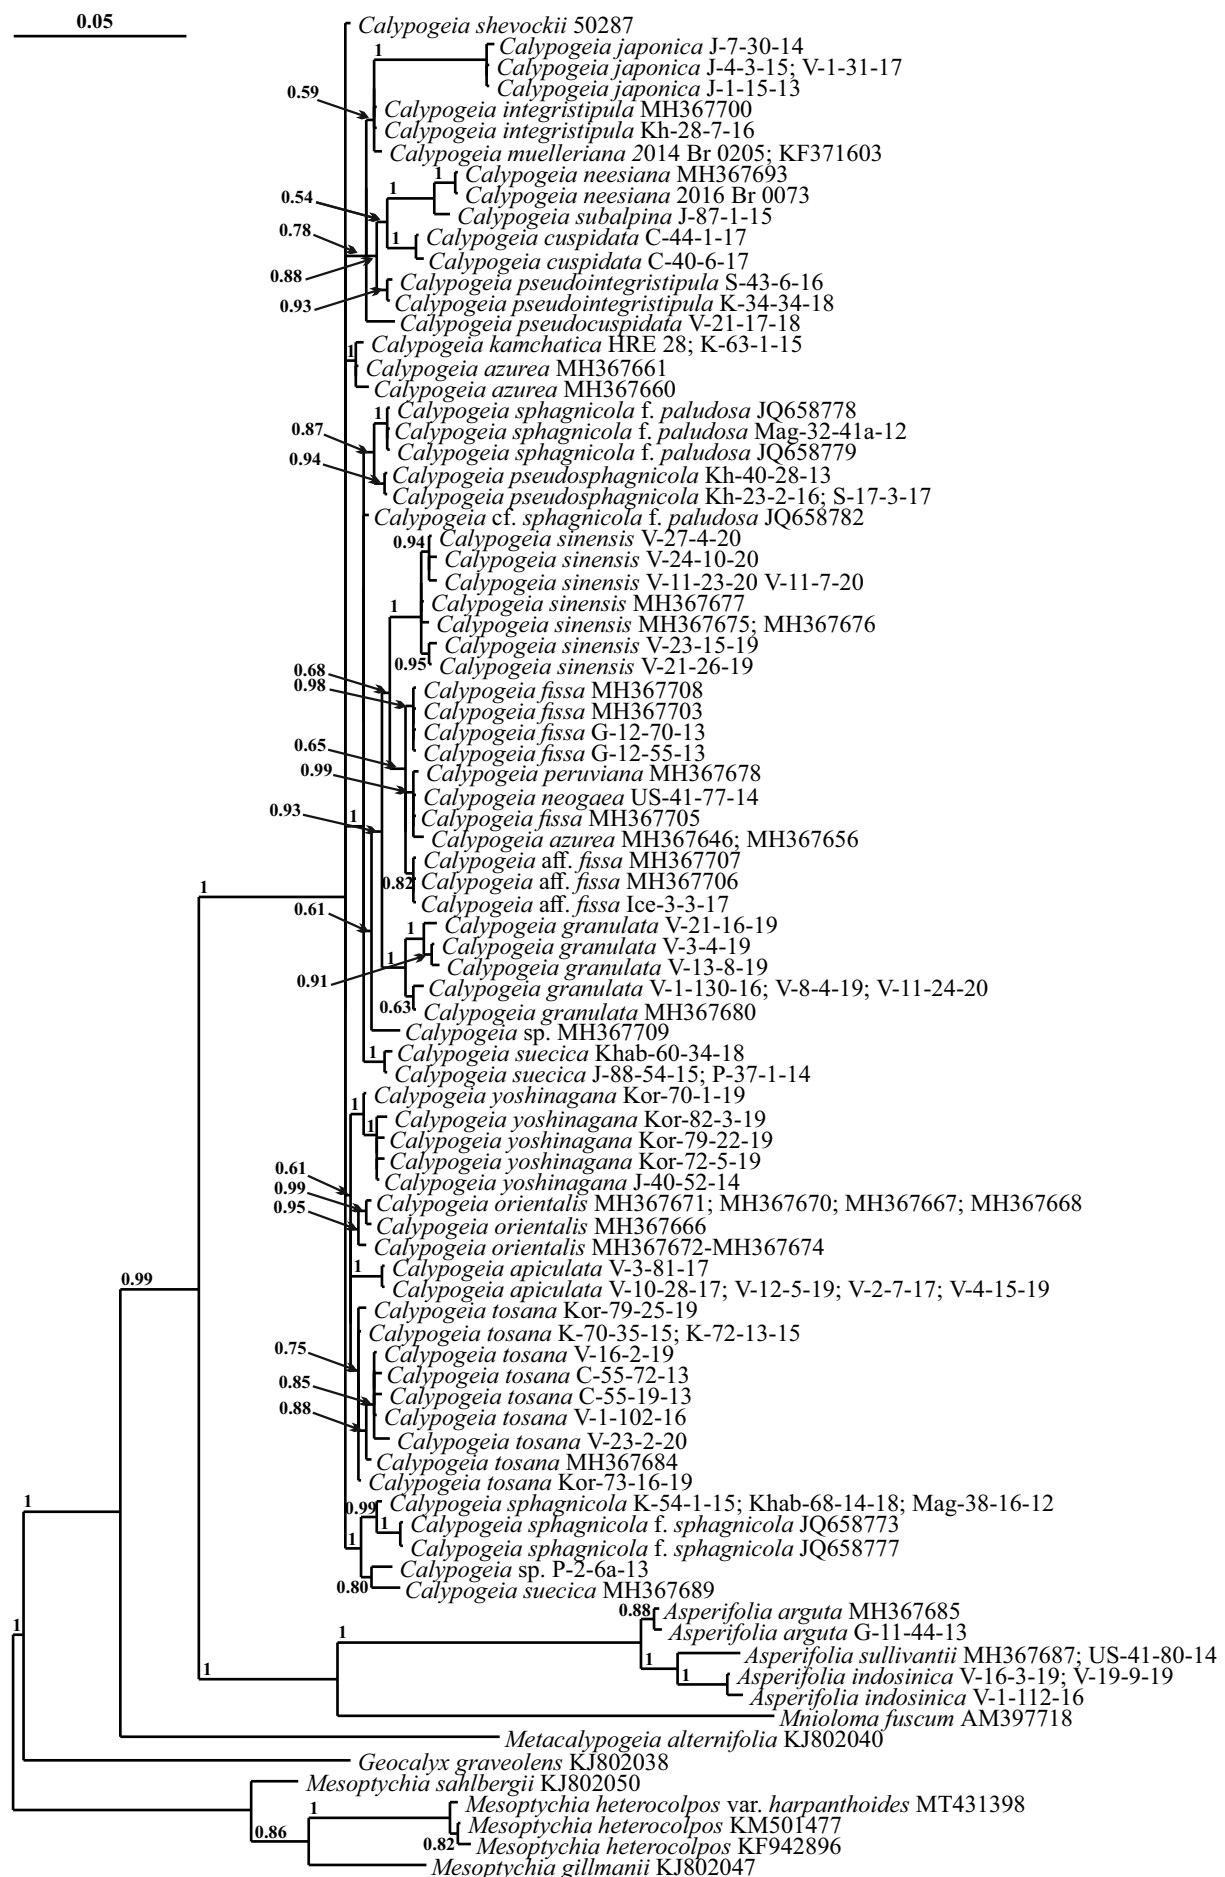

**Figure S1.** Condensed tree obtained in a Bayesian analysis for the genus *Calypogeia* and related taxa based on *trnG*-intron. The values of Bayesian posterior probabilities more than 0.50 are indicated. Scale bar corresponds to a number of nucleotide substitutions per site.

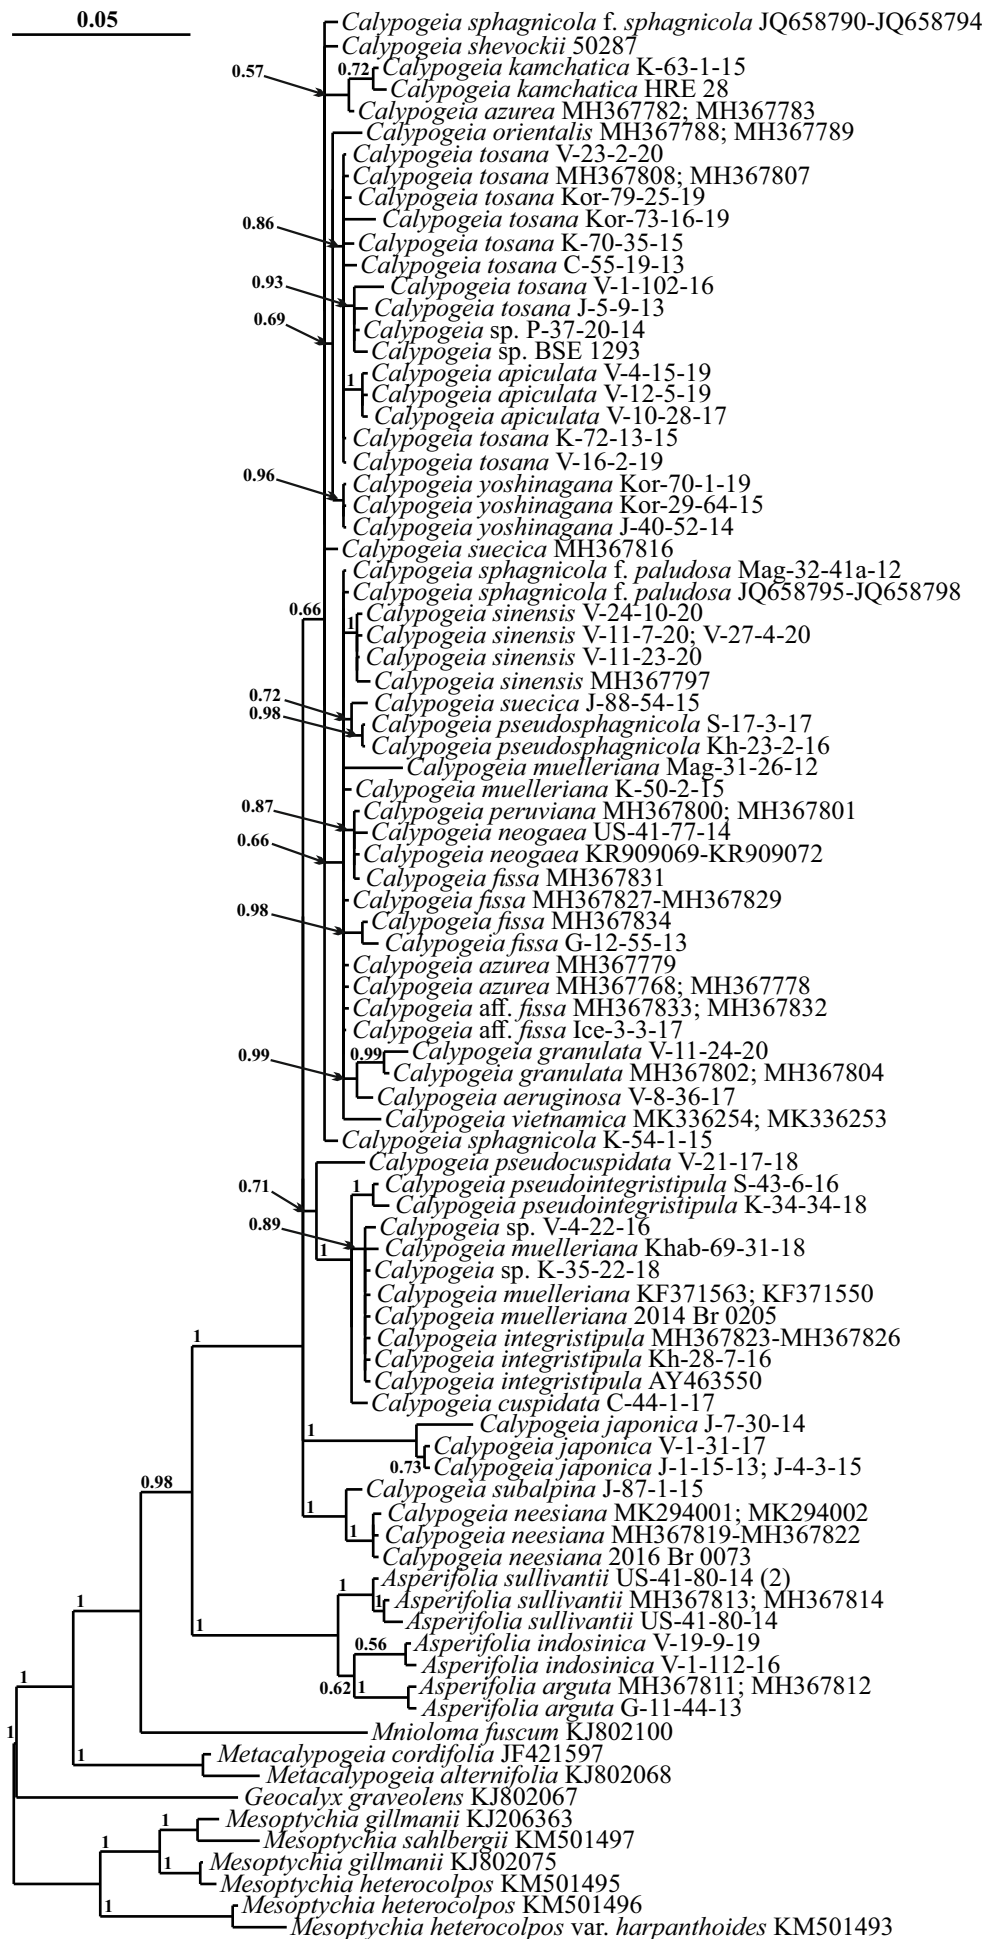

**Figure S2.** Condensed tree obtained in a Bayesian analysis for the genus *Calypogeia* and related taxa based on *trnL*–F. The values of Bayesian posterior probabilities more than 0.50 are indicated. Scale bar corresponds to a number of nucleotide substitutions per site.

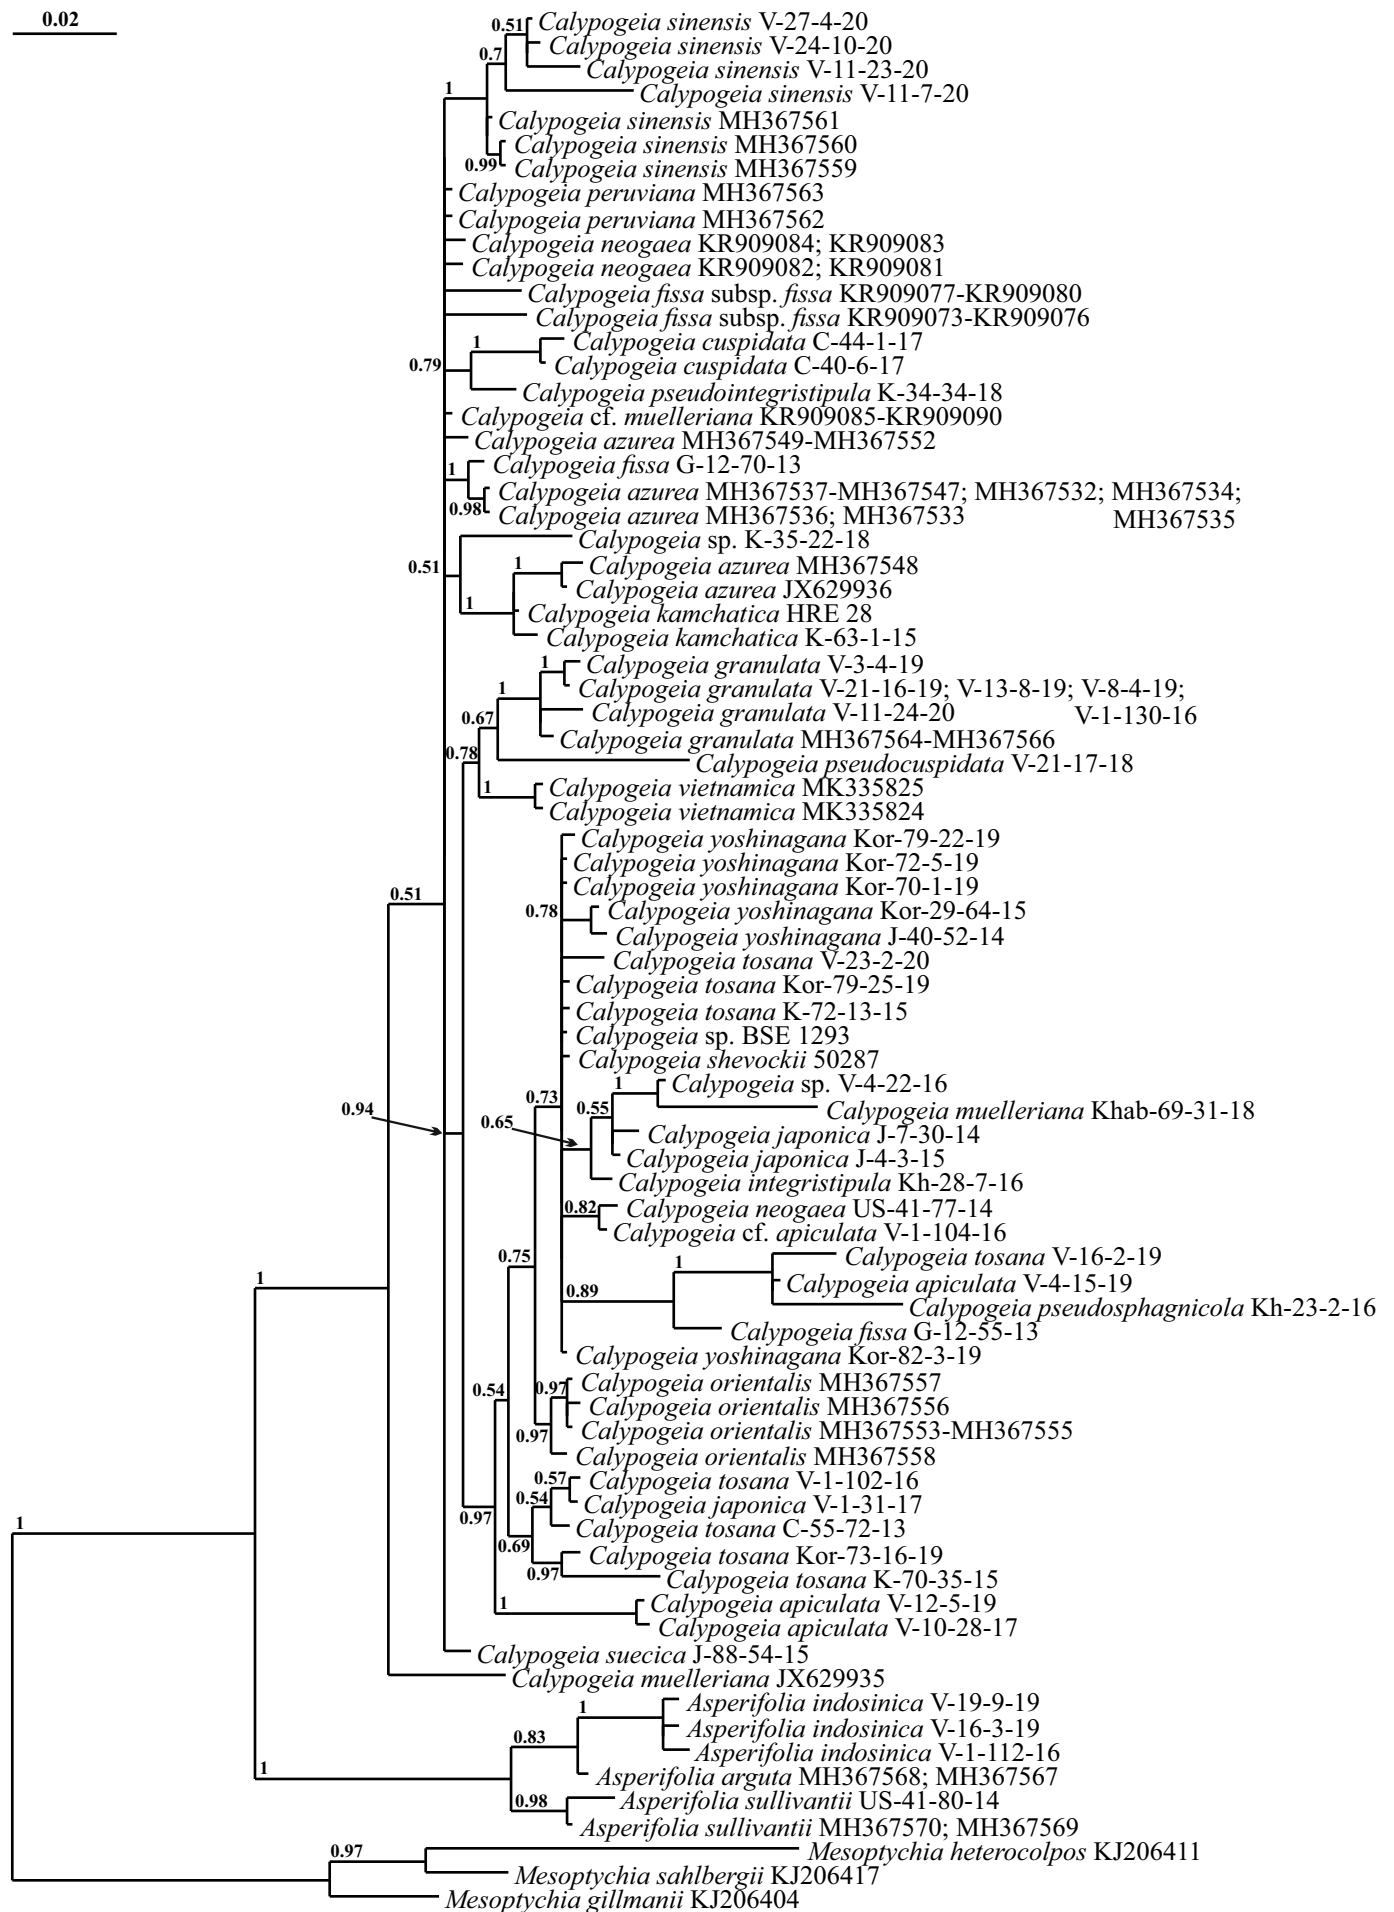

**Figure S3.** Condensed tree obtained in a Bayesian analysis for the genus *Calypogeia* and related taxa based on ITS 2. The values of Bayesian posterior probabilities more than 0.50 are indicated. Scale bar corresponds to a number of nucleotide substitutions per site.
